# Supplementary material for: Dinuclear platinum(ii) complexes with biphenyl-based bis-carbene ligands
Source: Royal Society of Chemistry journal article supplement (doi:10.1039/d3nj05731c), 2024-01-01
Supplement: d3nj05731c1.pdf [file d3nj05731c1.pdf]

# Dinuclear platinum(II) complexes with biphenyl-based bis-carbene ligands

*Rajat Naskar,<sup>§a</sup> Bhaskar Monda,<sup>§</sup> a Diya Sengupta,<sup>a</sup> Aninda Ghosh,<sup>a</sup> Somenath Garai<sup>b</sup> and Ramananda Maity<sup>\*a</sup>*

*[a]University of Calcutta, 92-APC Road, Kolkata 700009, India*

*E-mail: rmchem@caluniv.ac.in*

*[b]Department of Chemistry, Institute of Science, Banaras Hindu University, Varanasi 221005, Uttar Pradesh, India.*

*§: Both authors contributed equally.*

## Supporting Information

Index

- Figure S1.** <sup>1</sup>H NMR spectrum of [2] in CDCl<sub>3</sub>.
- Figure S2.** <sup>13</sup>C{<sup>1</sup>H} NMR spectrum of [2] in CDCl<sub>3</sub>.
- Figure S3.** HMQC NMR spectrum of [2] in CDCl<sub>3</sub>.
- Figure S4.** HMBC NMR spectrum of [2] in CDCl<sub>3</sub>.
- Figure S5.** <sup>1</sup>H NMR spectrum of [3] in CDCl<sub>3</sub>.
- Figure S6.** <sup>13</sup>C{<sup>1</sup>H} NMR spectrum of [3] in CDCl<sub>3</sub>.
- Figure S7.** HSQC NMR spectrum of [3] in CDCl<sub>3</sub>.
- Figure S8.** HMBC NMR spectrum of [3] in CDCl<sub>3</sub>.
- Figure S9.** <sup>1</sup>H NMR spectrum of [5] in CDCl<sub>3</sub>.
- Figure S10.** <sup>13</sup>C{<sup>1</sup>H} NMR spectrum of [5] in CDCl<sub>3</sub>.
- Figure S11.** HMQC NMR spectrum of [5] in CDCl<sub>3</sub>.
- Figure S12.** HMBC NMR spectrum of [5] in CDCl<sub>3</sub>.
- Figure S13.** <sup>1</sup>H NMR spectrum of [6] in CDCl<sub>3</sub>.
- Figure S14.** <sup>13</sup>C{<sup>1</sup>H} NMR spectrum of [6] in CDCl<sub>3</sub>.
- Figure S15.** HMQC NMR spectrum of [6] in CDCl<sub>3</sub>.
- Figure S16.** HMBC NMR spectrum of [6] in CDCl<sub>3</sub>.
- Figure S17.** <sup>1</sup>H NMR spectrum of CDCl<sub>3</sub>.
- Figure S18.** <sup>1</sup>H NMR spectrum of 8 in CDCl<sub>3</sub>.
- Figure S19.** <sup>13</sup>C{<sup>1</sup>H} NMR spectrum of 8 in CDCl<sub>3</sub>.
- Table S1.** Crystallographic details.
- Table S2.** Selected bond lengths in Å.
- Table S3.** Selected bond angles in °

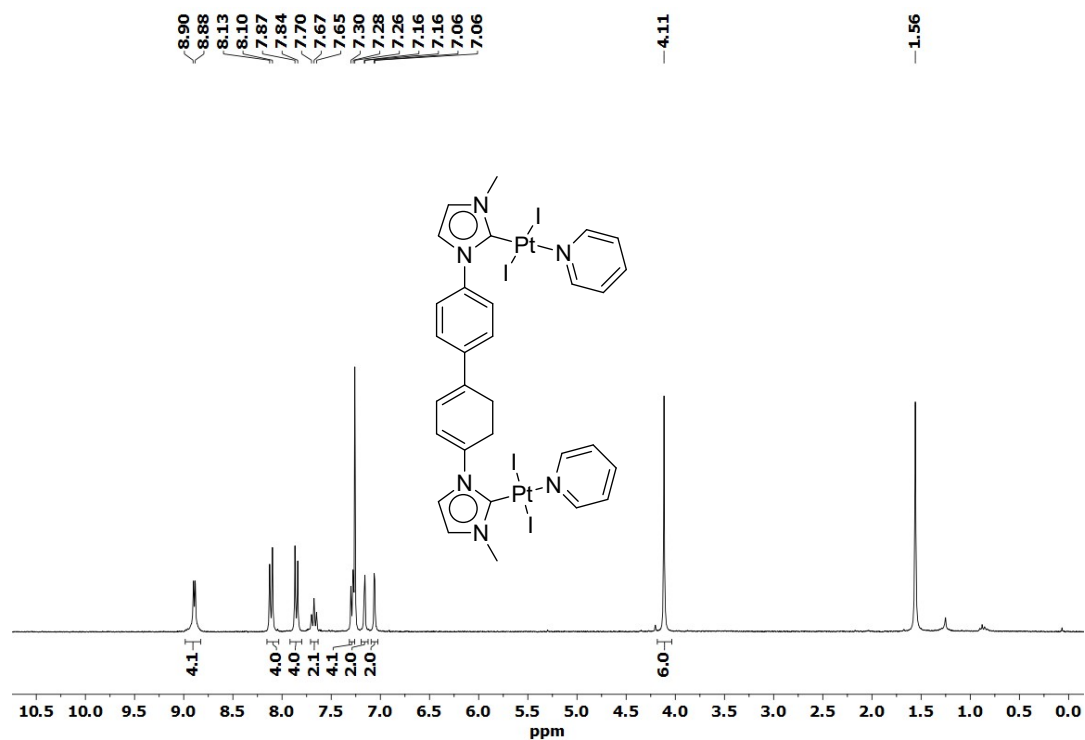

**Figure S1.**  $^1\text{H NMR}$  spectrum of [2] in  $\text{CDCl}_3$  ( $\delta = 1.56$ :  $\text{H}_2\text{O}$  from  $\text{CDCl}_3$  solvent).

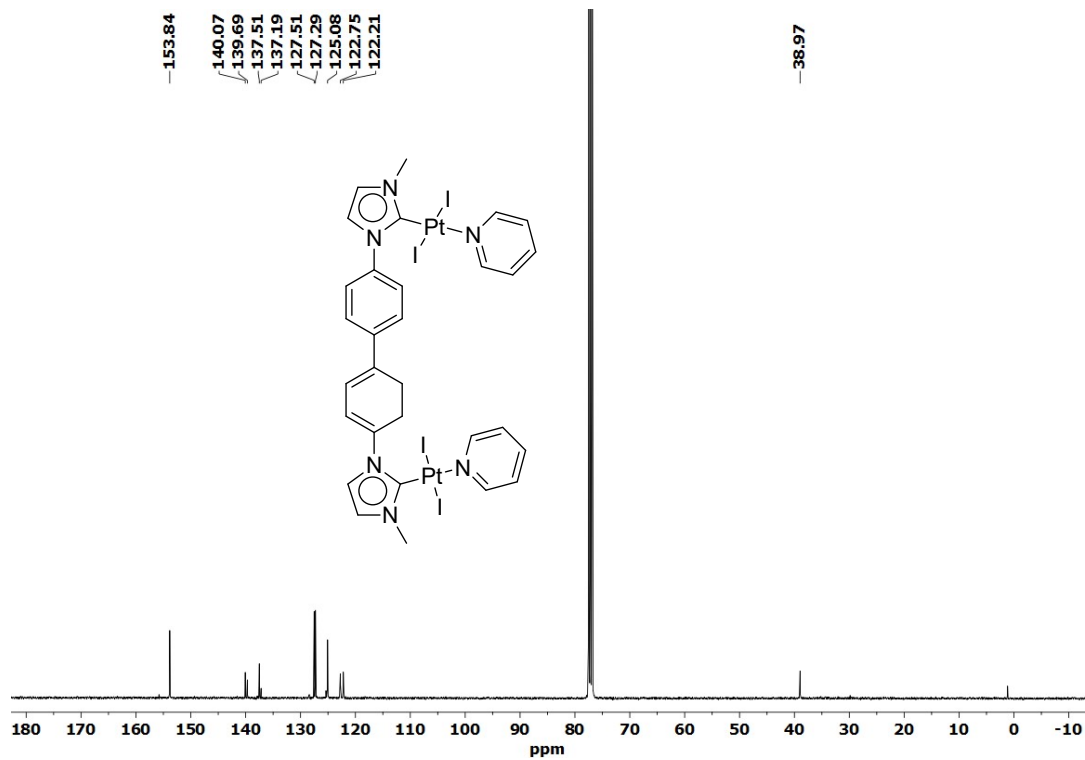

**Figure S2.**  $^{13}\text{C}\{^1\text{H}\}$  NMR spectrum of [2] in  $\text{CDCl}_3$ .

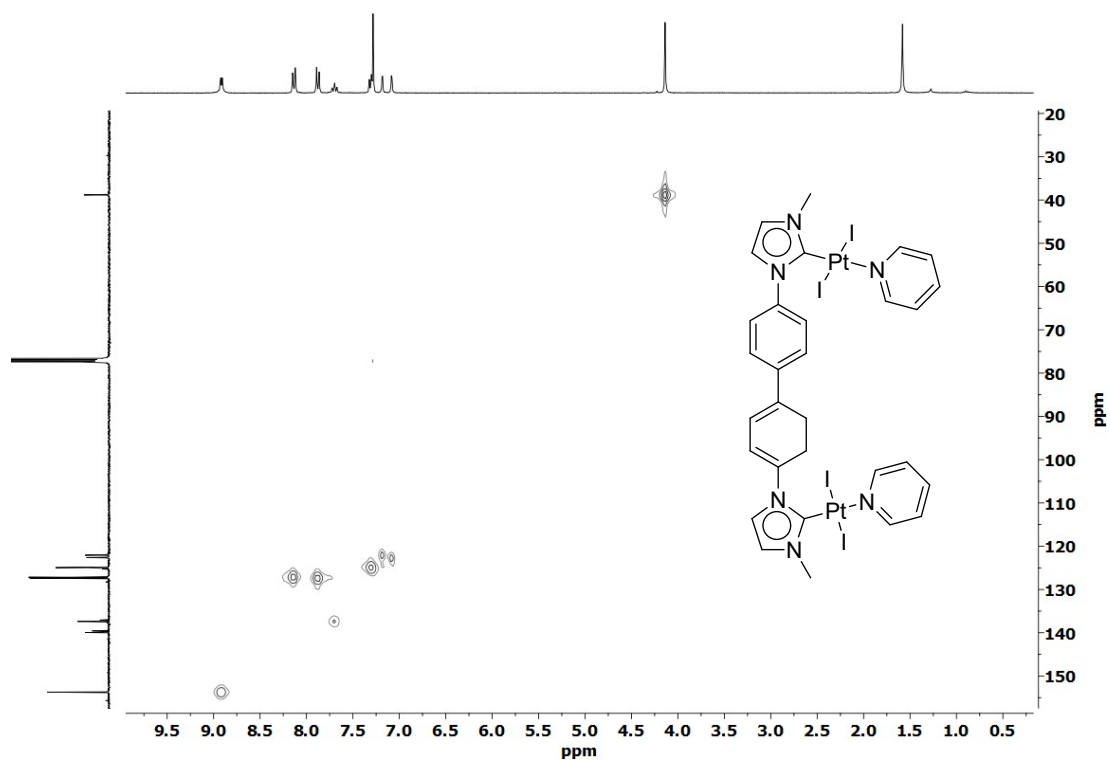

**Figure S3.** HMQC NMR spectrum of [2] in  $\text{CDCl}_3$ .

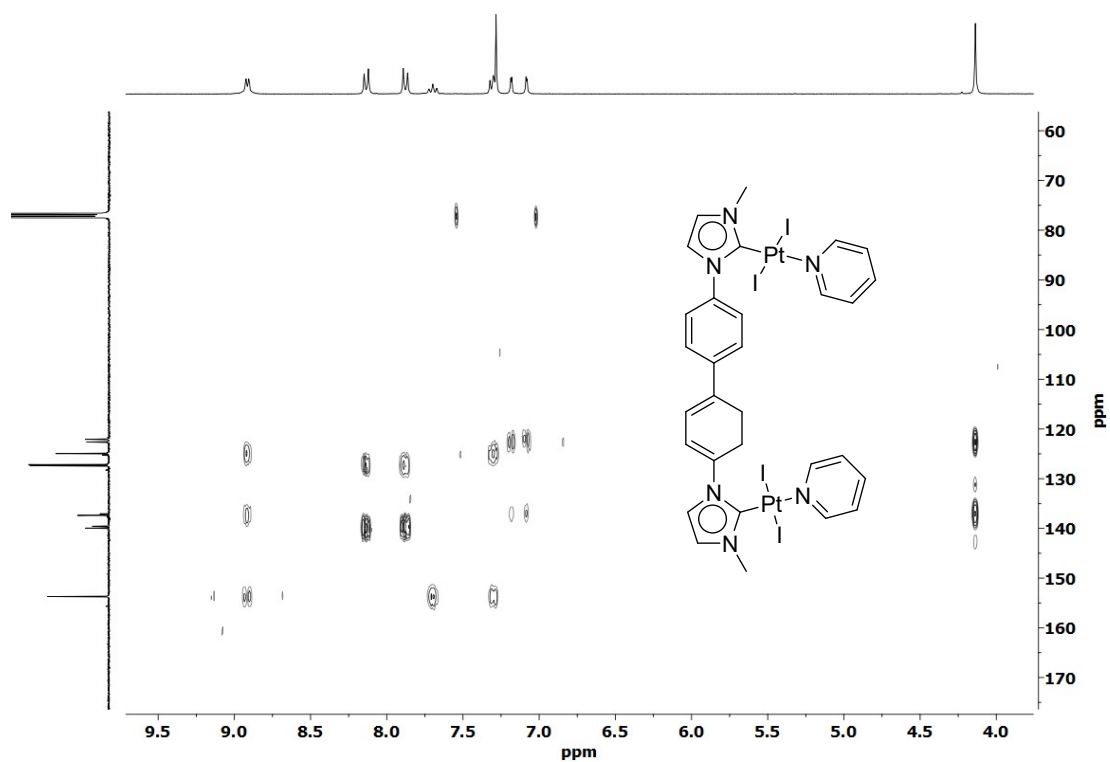

**Figure S4.** HMBC NMR spectrum of [2] in  $\text{CDCl}_3$  ( $^{195}\text{Pt}$ - $^{13}\text{C}$  coupling at  $\delta = 4.11$  ppm  $^1\text{H}$  scale).

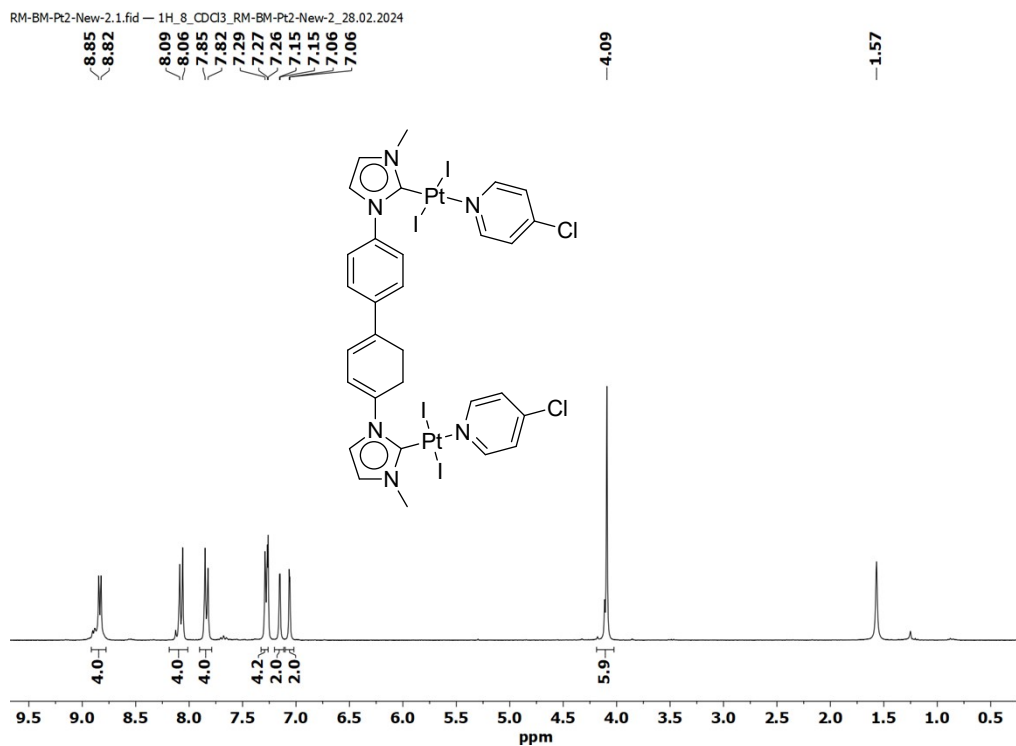

**Figure S5.**  $^1\text{H}$  NMR spectrum of [3] in  $\text{CDCl}_3$  ( $\delta = 1.57$ :  $\text{H}_2\text{O}$  from  $\text{CDCl}_3$  solvent).

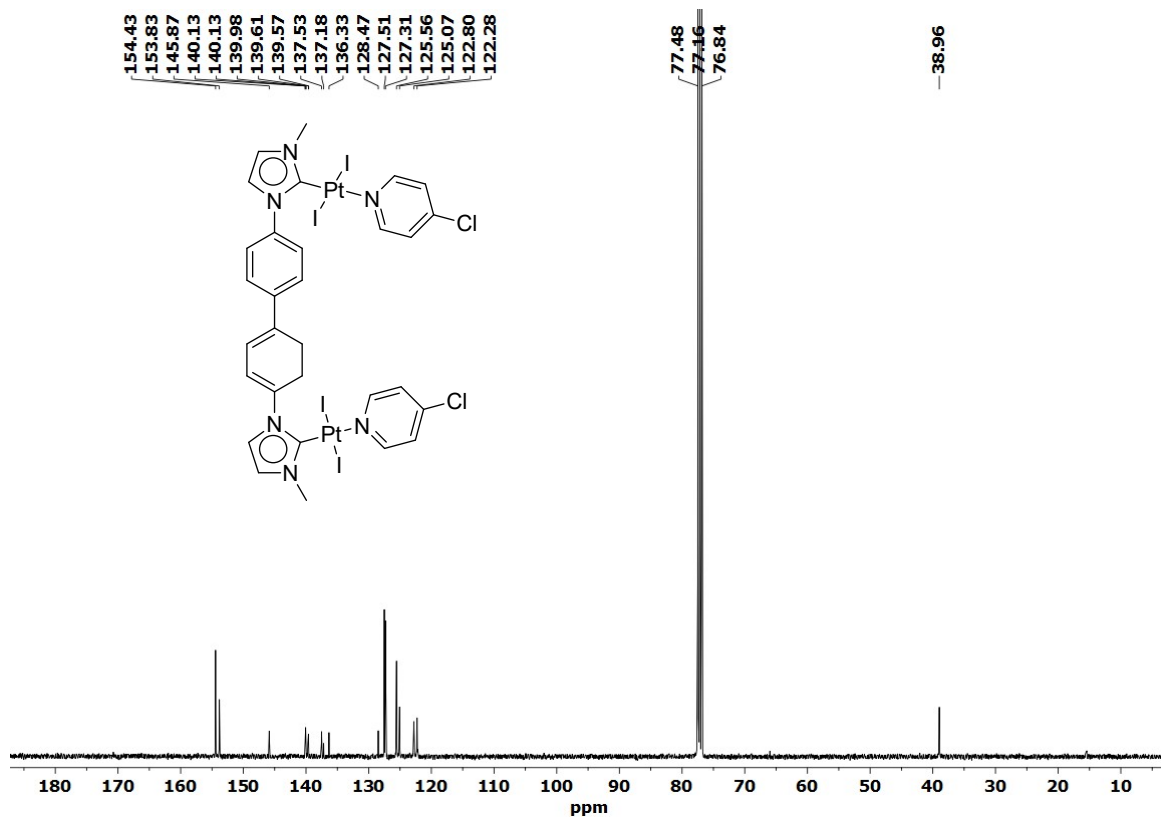

**Figure S6.**  $^{13}\text{C}\{^1\text{H}\}$  NMR spectrum of [3] in  $\text{CDCl}_3$ .

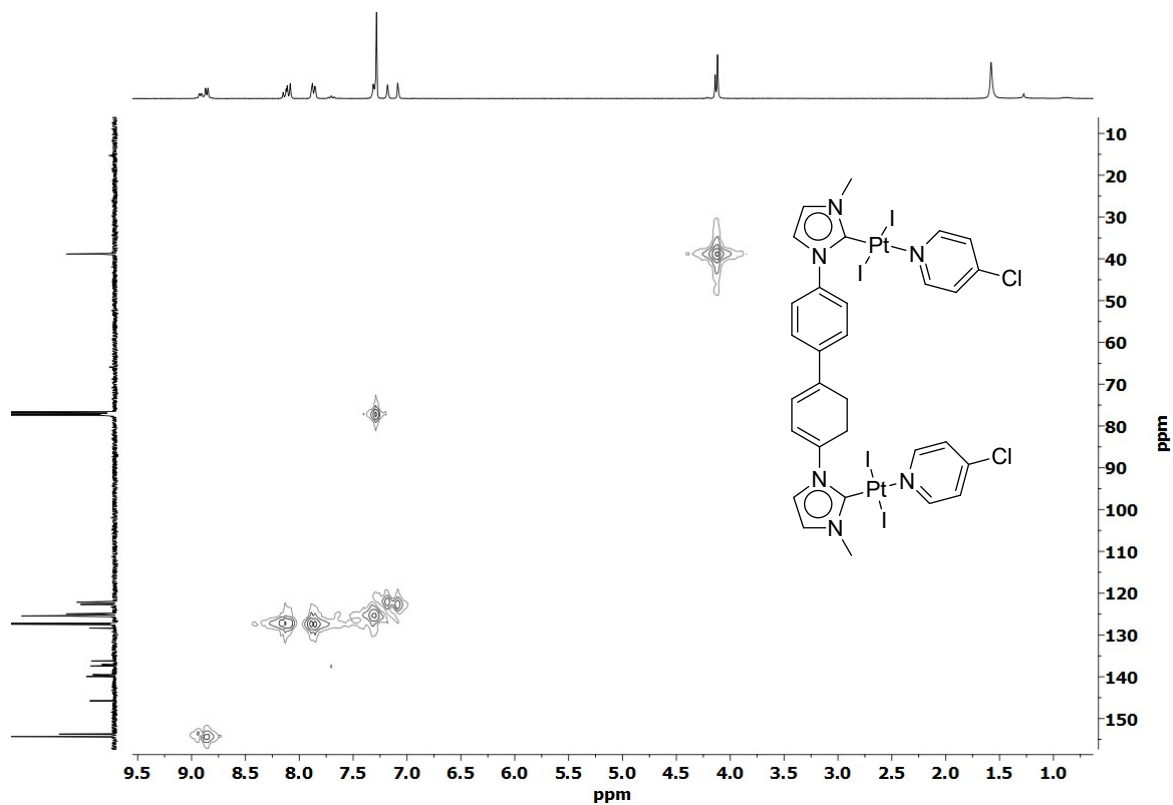

**Figure S7.** HSQC NMR spectrum of [3] in  $\text{CDCl}_3$ .

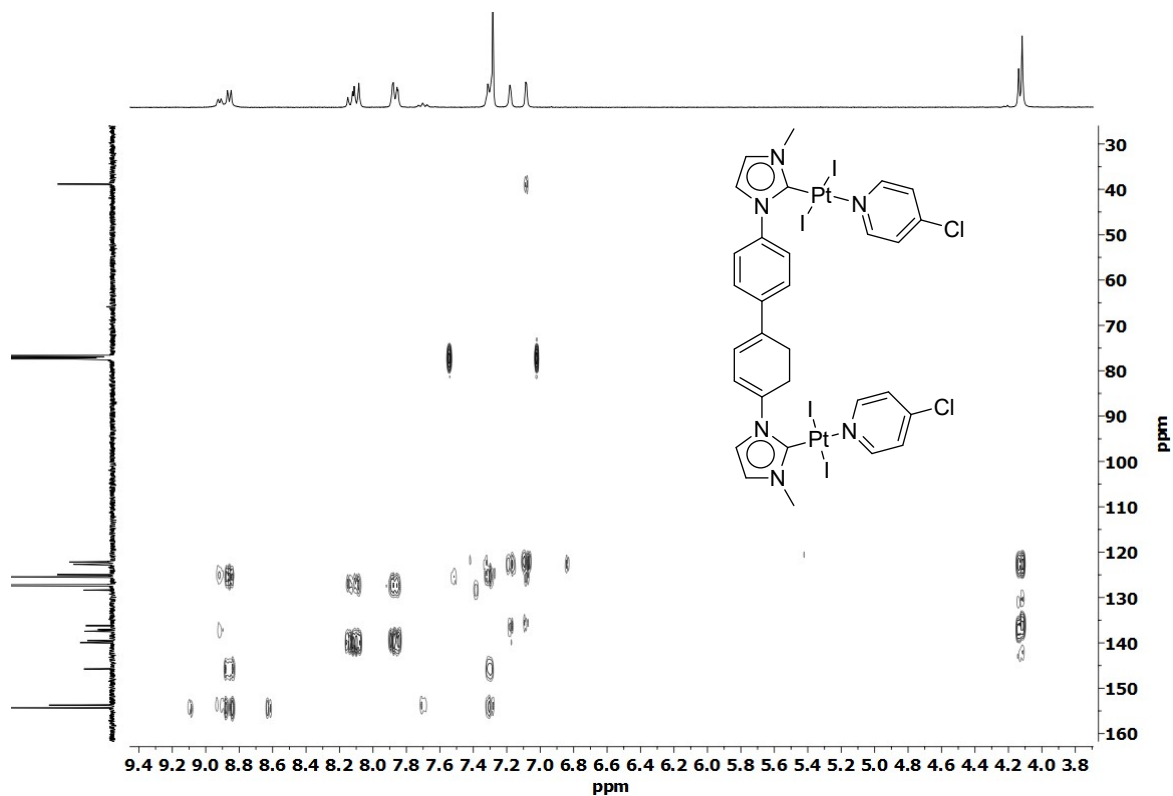

**Figure S8.** HMBC NMR spectrum of [3] in  $\text{CDCl}_3$ .

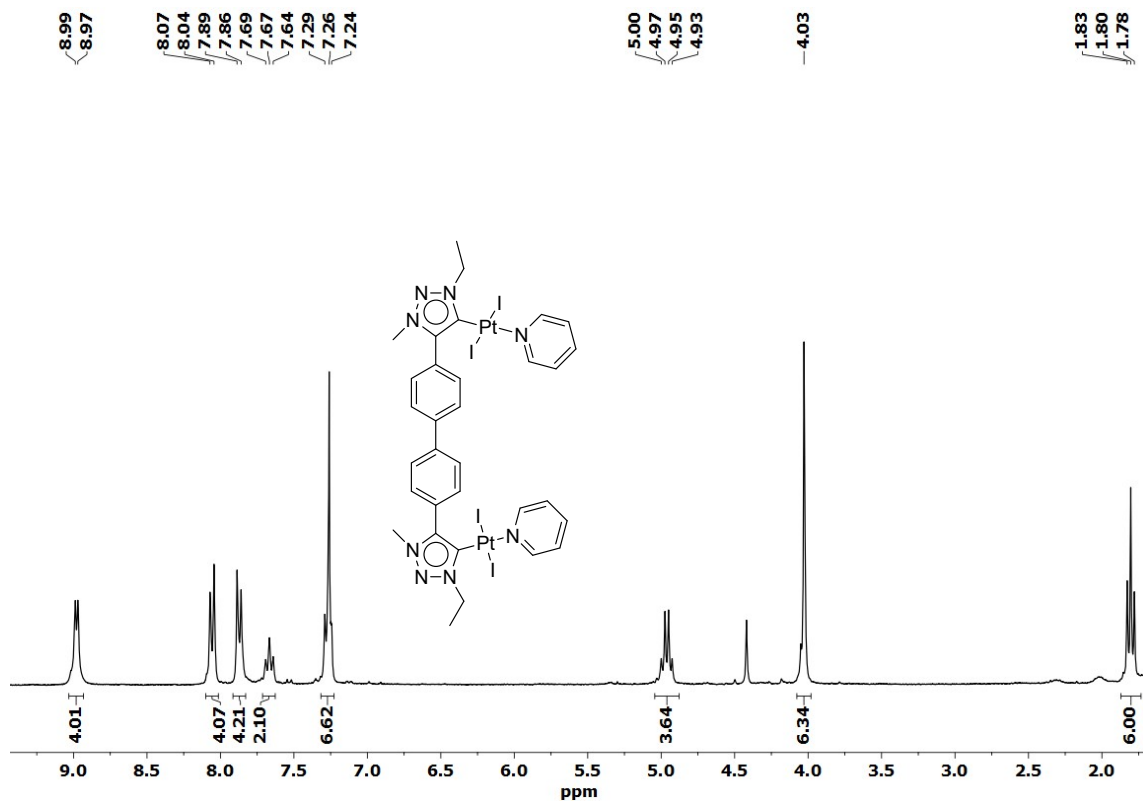

Figure S9.  $^1\text{H}$  NMR spectrum of [5] in  $\text{CDCl}_3$ .

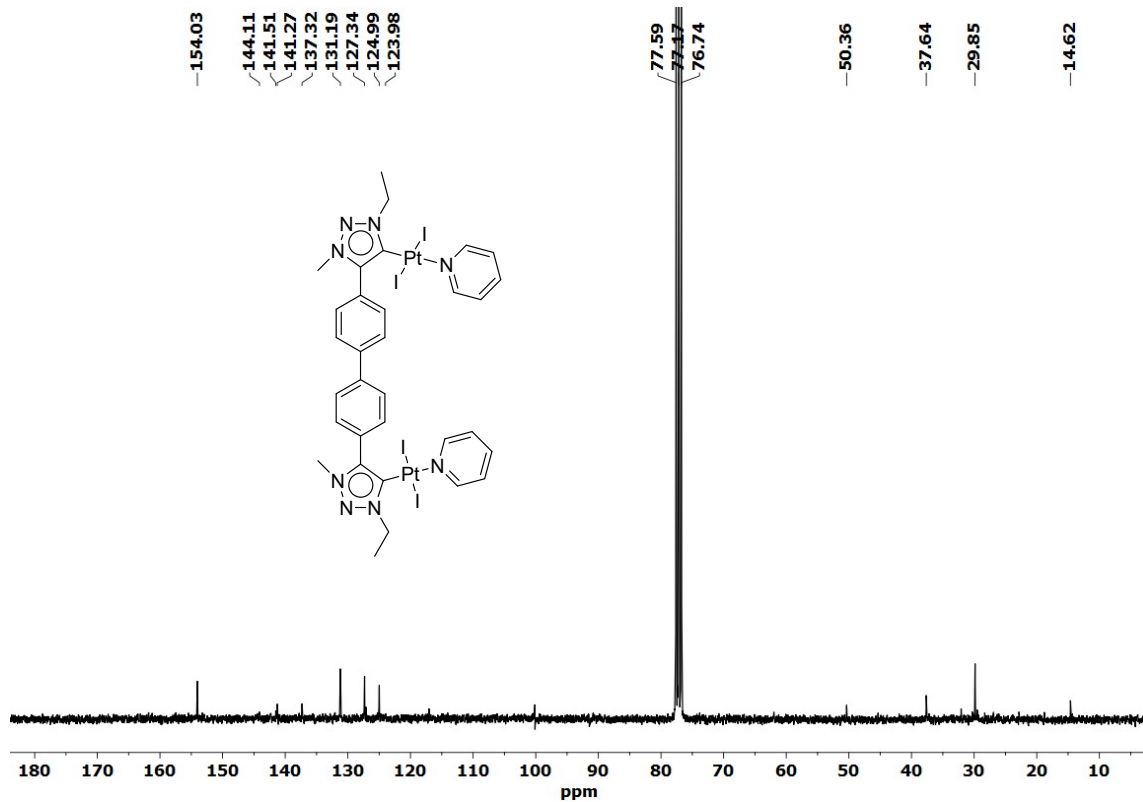

Figure S10.  $^{13}\text{C}\{^1\text{H}\}$  NMR spectrum of [5] in  $\text{CDCl}_3$ .

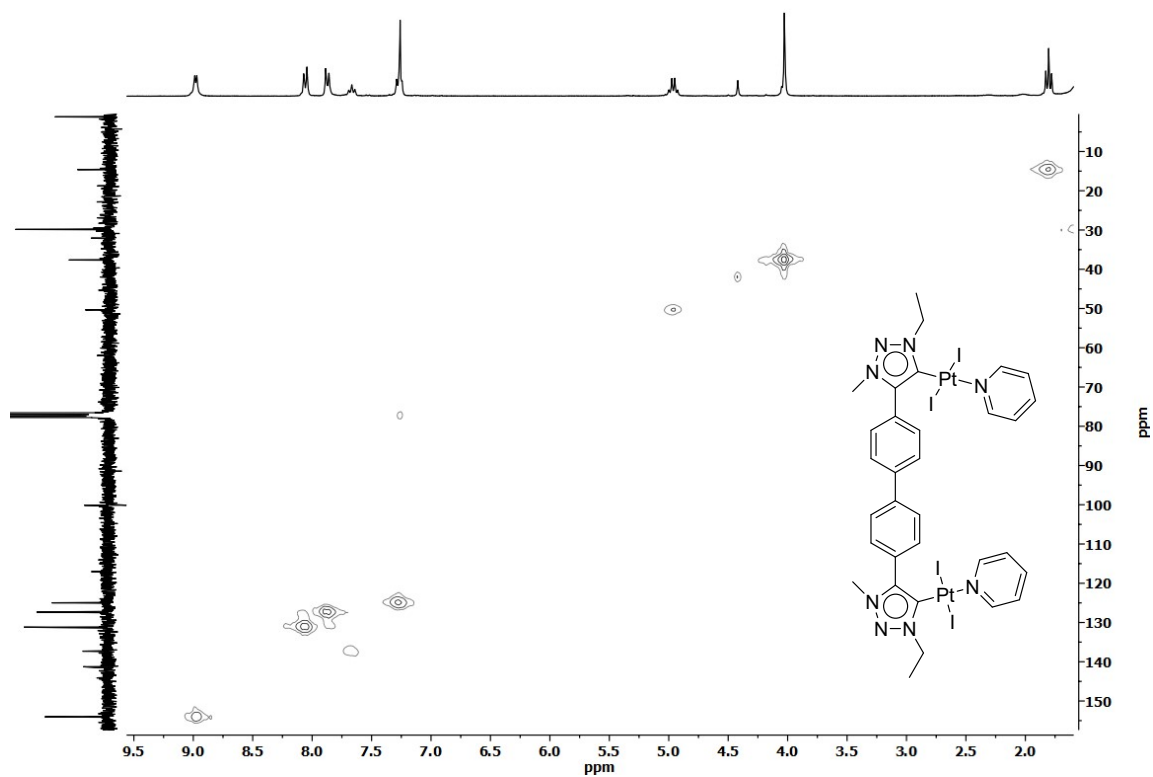

Figure S11. HMQC NMR spectrum of [5] in CDCl<sub>3</sub>.

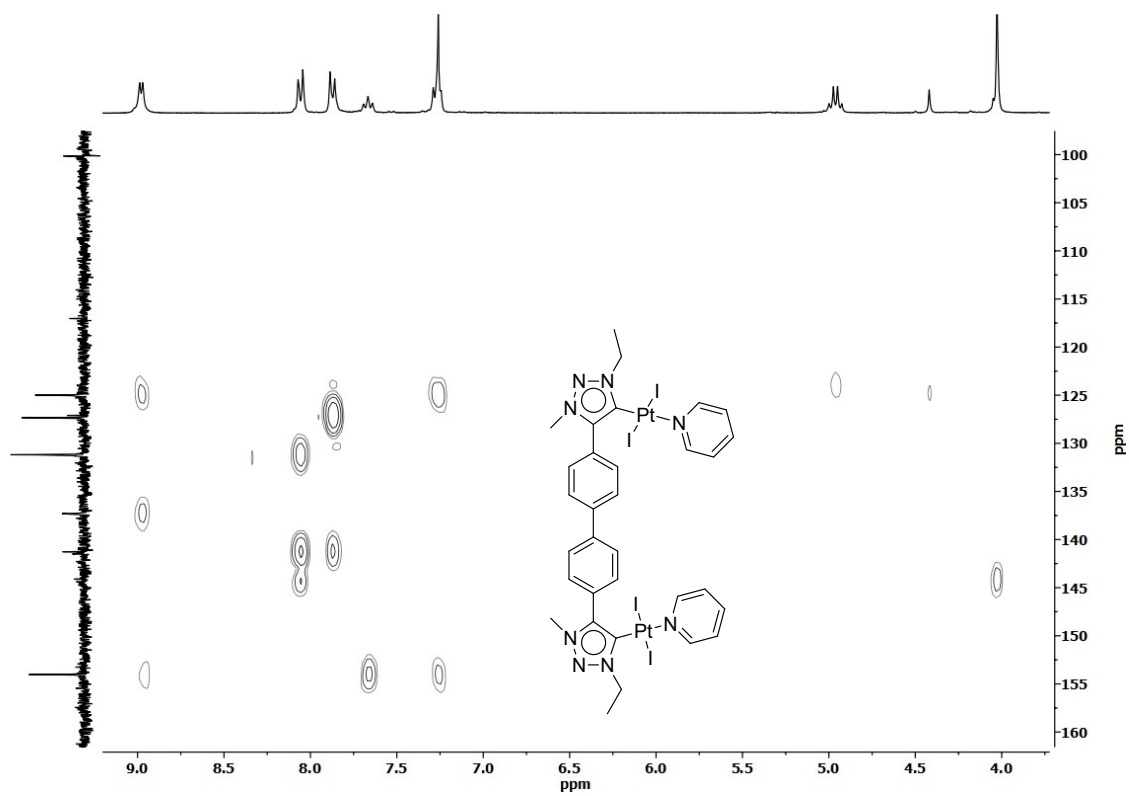

Figure S12. HMBC NMR spectrum of [5] in CDCl<sub>3</sub>.

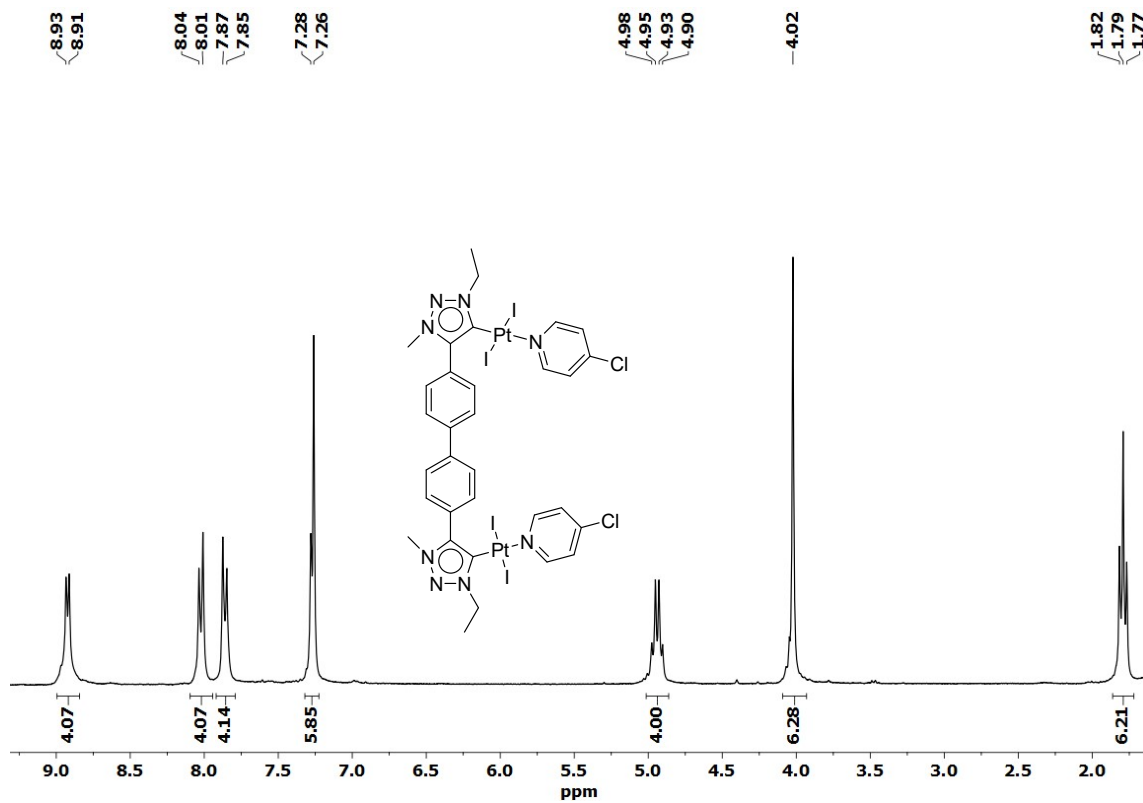

Figure S13.  $^1\text{H}$  NMR spectrum of [6] in  $\text{CDCl}_3$ .

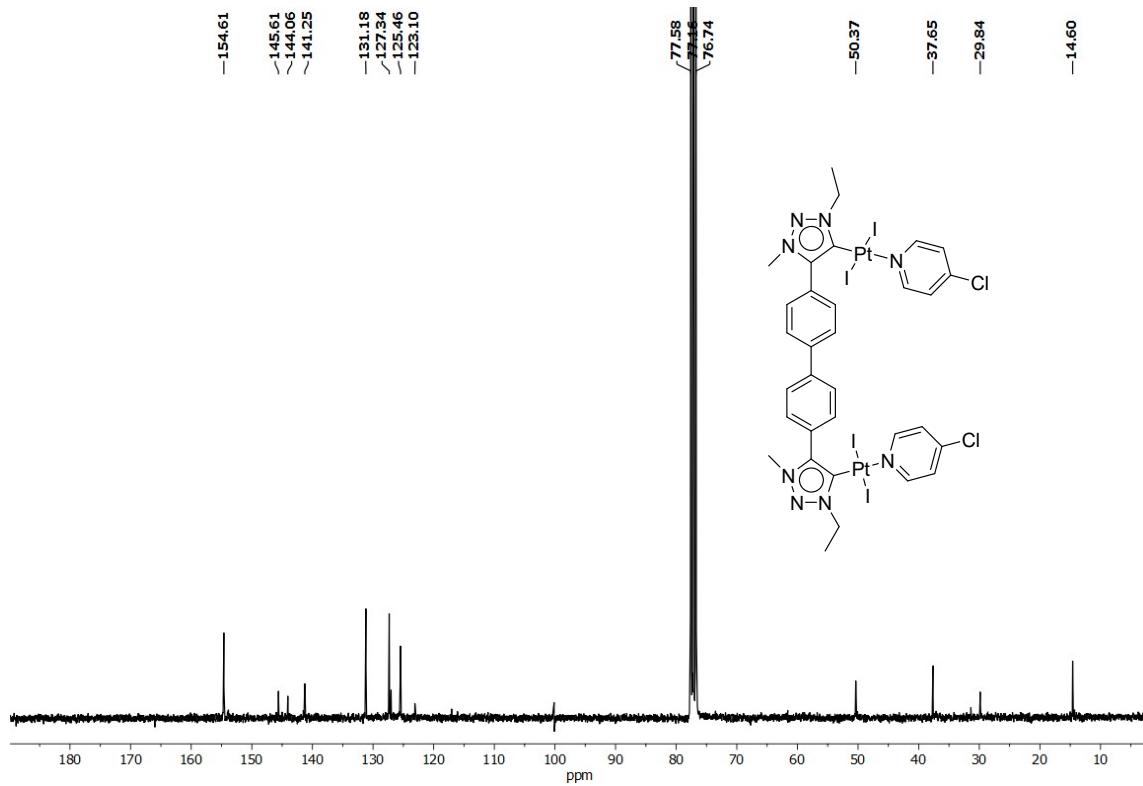

Figure S14.  $^{13}\text{C}\{^1\text{H}\}$  NMR spectrum of [6] in  $\text{CDCl}_3$ .



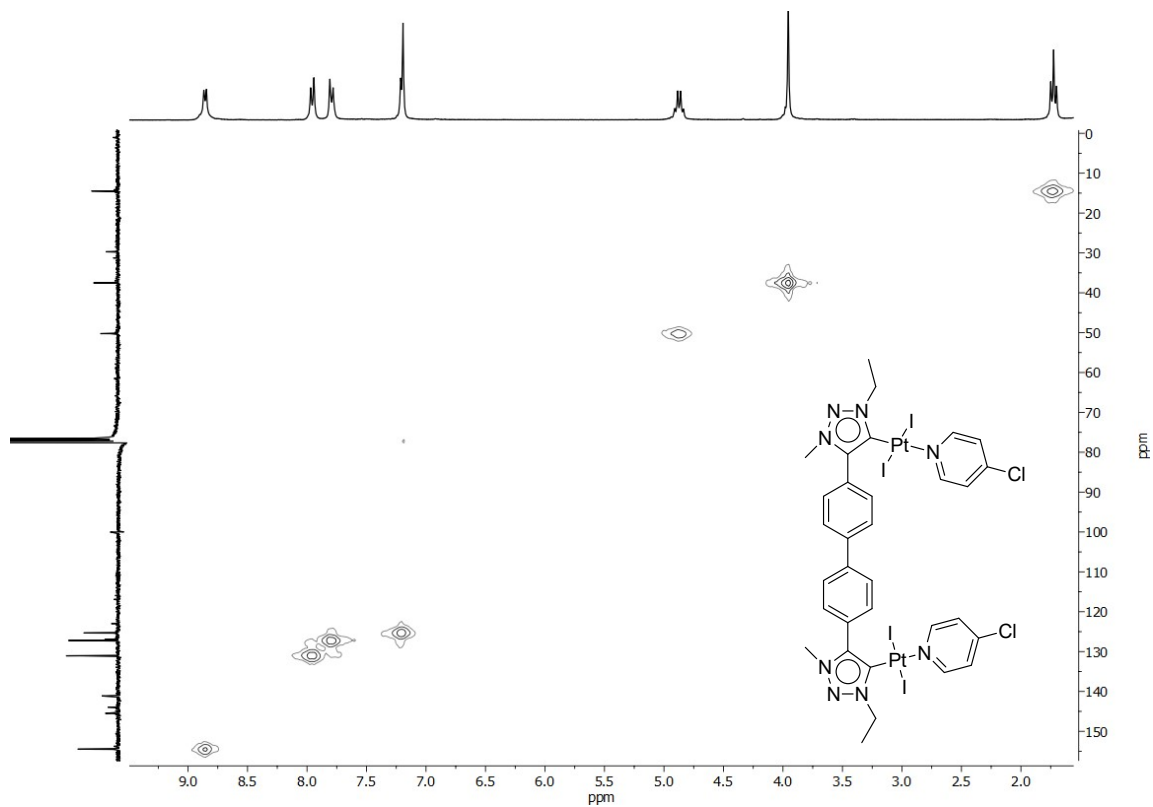

Figure S15. HMQC NMR spectrum of [6] in CDCl<sub>3</sub>.

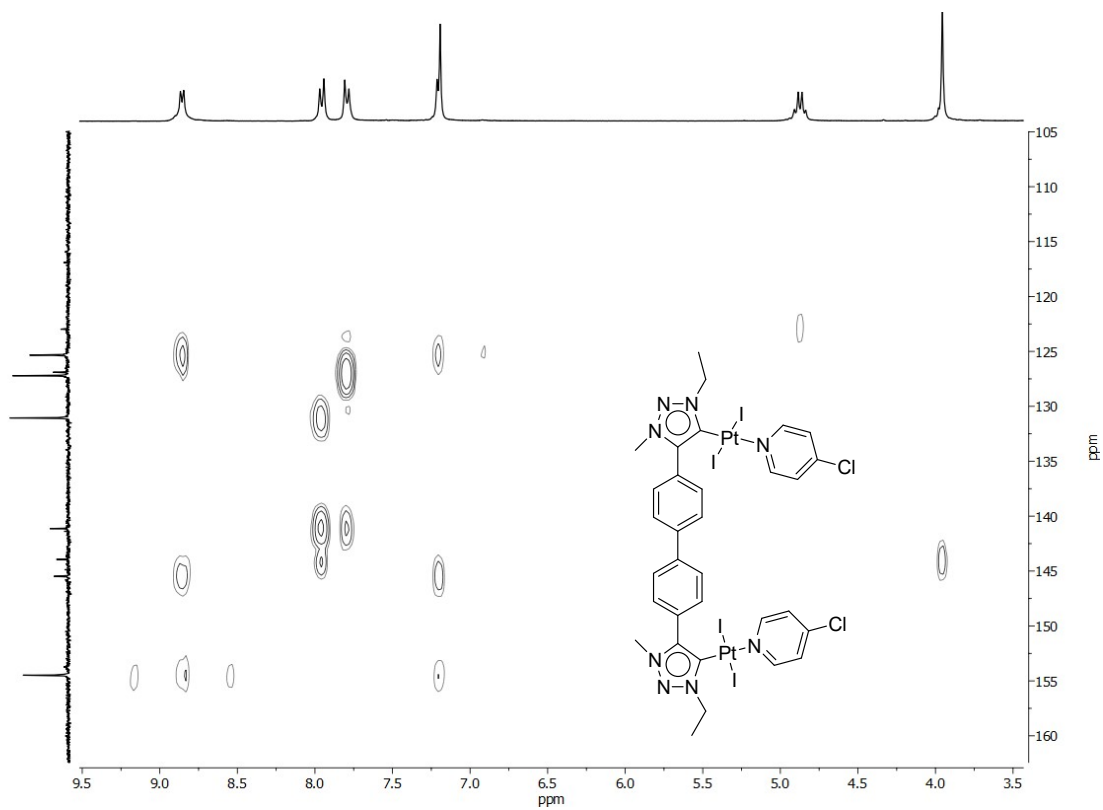

Figure S16. HMBC NMR spectrum of [6] in CDCl<sub>3</sub>.

RM-CDCl3\_Test\_2.1.fid — 1H\_CDCl3\_RM-CDCl3\_Test\_2\_26.02.2024

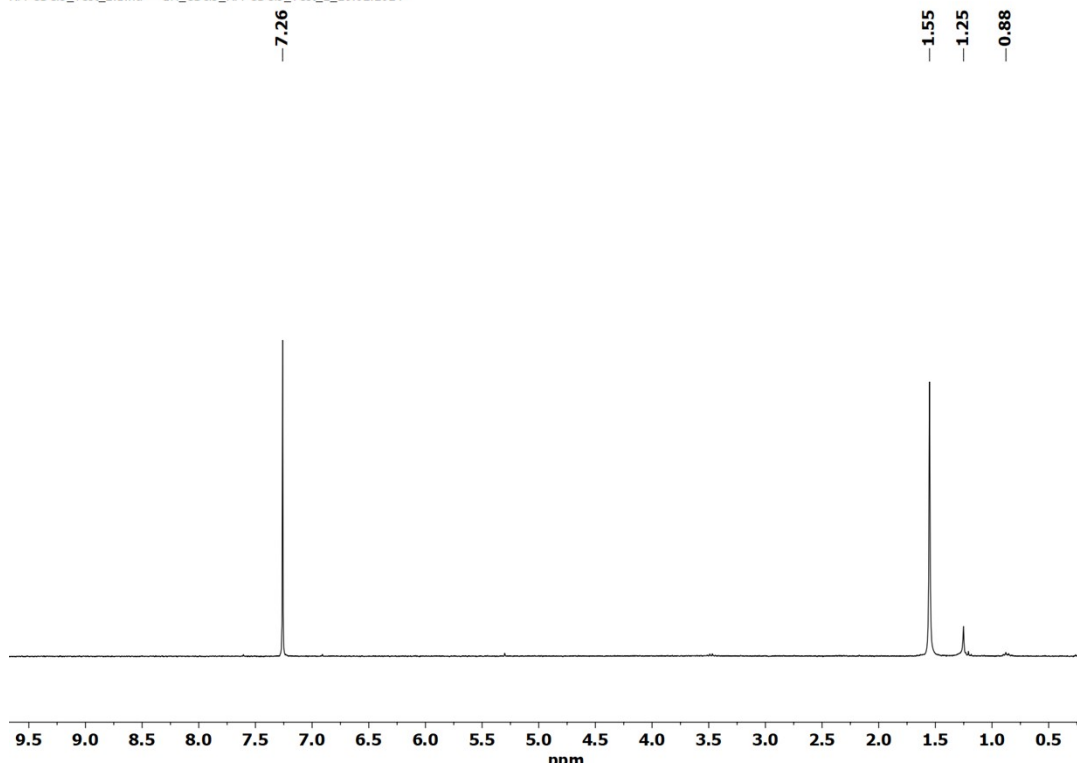

**Figure S17.** <sup>1</sup>H NMR spectrum of CDCl<sub>3</sub> ( $\delta = 1.55$ : H<sub>2</sub>O from CDCl<sub>3</sub> solvent; very small humps at  $\delta \sim 1.25$  and  $\sim 0.88$  from the very small amount of grease in CDCl<sub>3</sub>).

RM-BM-FP-2.10.fid — 1H-CDCl3-RM-BM-FP-2-28-03-2024

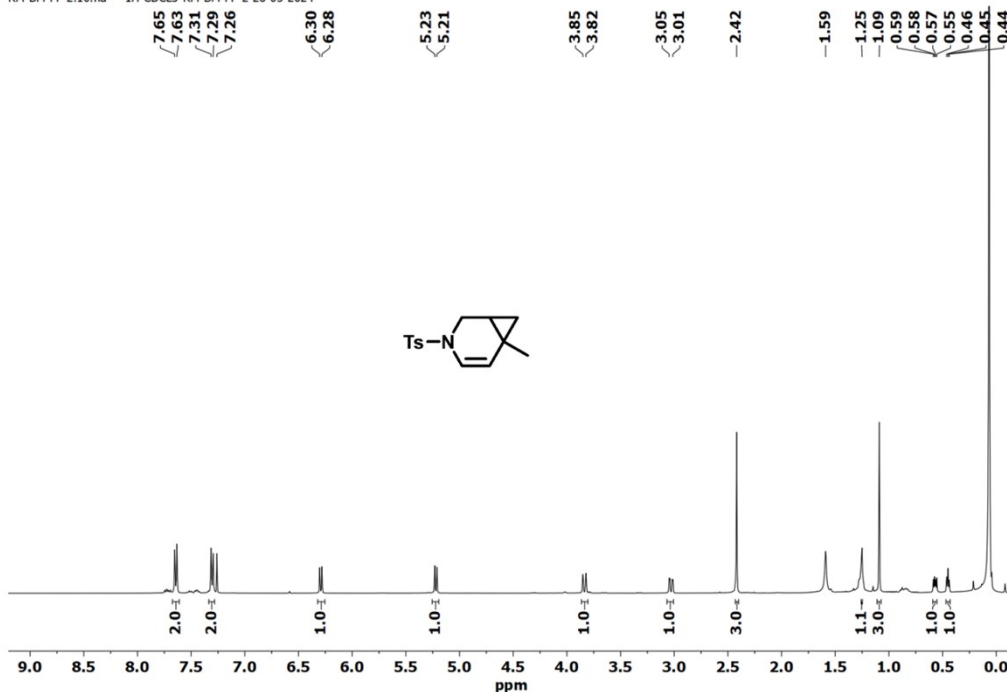

**Figure S18.** <sup>1</sup>H NMR spectrum of **8** in CDCl<sub>3</sub>.

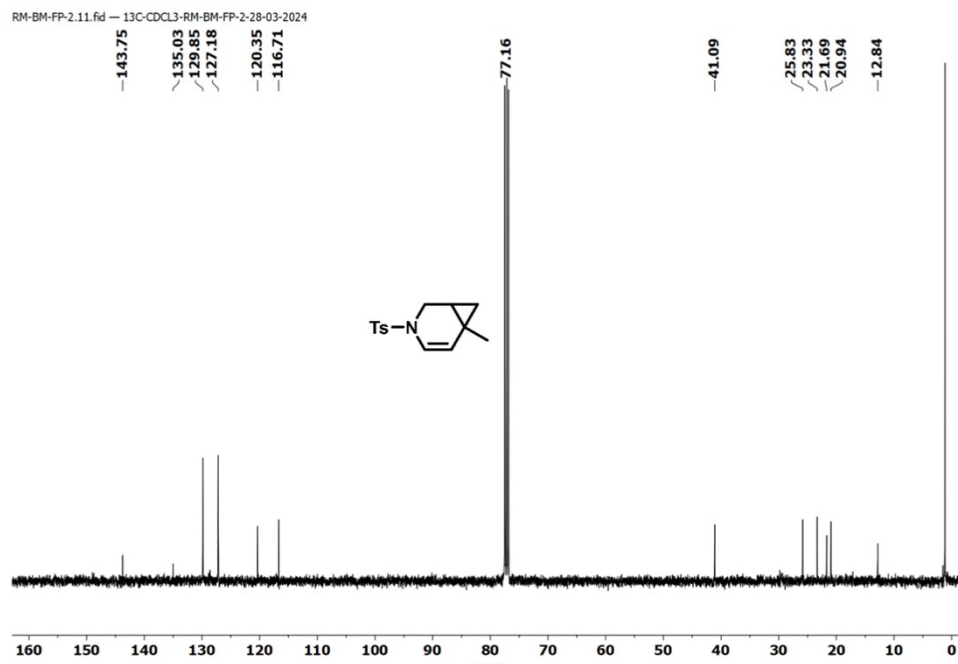

**Figure S19.**  $^{13}\text{C}\{^1\text{H}\}$  NMR spectrum of **8** in  $\text{CDCl}_3$ .

**Table S1.** Crystallographic details

|                                                |                                                             |
|------------------------------------------------|-------------------------------------------------------------|
|                                                | [2]                                                         |
| Chemical formula                               | $\text{C}_{30}\text{H}_{28}\text{I}_4\text{N}_6\text{Pt}_2$ |
| $M_r$                                          | 1370.34                                                     |
| Crystal system                                 | monoclinic                                                  |
| Space group                                    | C2                                                          |
| a (Å)                                          | 14.136(3)                                                   |
| b (Å)                                          | 8.7735(16)                                                  |
| c (Å)                                          | 17.072(3)                                                   |
| $\alpha$ (°)                                   | 90.00                                                       |
| $\beta$ (°)                                    | 97.292(7)                                                   |
| $\gamma$ (°)                                   | 90.00                                                       |
| V (Å <sup>3</sup> )                            | 2100.2(7)                                                   |
| Z                                              | 2                                                           |
| Density (g cm <sup>-3</sup> )                  | 2.167                                                       |
| F(000)                                         | 1236.0                                                      |
| Radiation Type                                 | Mo $K_\alpha$                                               |
| $\mu$ (mm <sup>-1</sup> )                      | 9.618                                                       |
| Crystal size                                   | 0.24 × 0.13 × 0.12                                          |
| Meas. Refl.                                    | 10224                                                       |
| Indep. Refl.                                   | 4463                                                        |
| Obsvd. $[I > 2\sigma(I)]$ refl.                | 4029                                                        |
| $R_{\text{int}}$                               | 0.0615                                                      |
| R [ $F^2 > 2\sigma(F^2)$ ]                     | 0.0598                                                      |
| wR( $F^2$ )                                    | 0.1602                                                      |
| S                                              | 1.055                                                       |
| $\Delta\rho_{\text{max}}$ (e Å <sup>-3</sup> ) | 1.768                                                       |
| $\Delta\rho_{\text{min}}$ (e Å <sup>-3</sup> ) | -2.194                                                      |

**Table S2.** Selected bond lengths in Å

| Atoms         | [2]       |
|---------------|-----------|
| I1 – Pt1 – I2 | 177.98(7) |
| I1 – Pt1 – N3 | 88.4(5)   |
| I2 – Pt1 – N3 | 89.7(5)   |
| I1 – Pt1 – C1 | 93.4(5)   |
| I2 – Pt1 – C1 | 88.6(5)   |
| C1 – Pt1 – N3 | 176.5(8)  |
| N1 – C1 – N2  | 104.6(19) |

**Table S3.** Selected bond angles in °

| Atoms    | [2]        |
|----------|------------|
| Pt1 – I1 | 2.6244(16) |
| Pt1 – I2 | 2.5894(17) |
| Pt1 – N3 | 2.090(19)  |
| Pt1 – C1 | 2.04(2)    |
| N1 – C1  | 1.34(3)    |
| N2 – C1  | 1.29(3)    |
